# Supplementary material for: Mixed solvent-assisted synthesis of high mass loading amorphous NiCo-MOF as a promising electrode material for supercapacitors
Source: Royal Society of Chemistry journal article supplement (doi:10.1039/d3dt02354k), 2023-01-01
Supplement: d3dt02354k1.pdf [file d3dt02354k1.pdf]

## Supporting Information

### Mixed solvents assisted synthesis of high mass loading amorphous NiCo-MOF as promising electrode material for supercapacitors

Faxue Lu<sup>a,1</sup>, Junnan Yao<sup>a,1</sup>, Yajun Ji<sup>\*a</sup>, Dong Shi<sup>a</sup>, Pengcheng Zhang<sup>a</sup>, Shixiong Zhang<sup>a</sup>

<sup>a</sup> School of Materials and Chemistry, University of Shanghai for Science and Technology, Jungong Road 334#, 200093 Shanghai, China.

\* Corresponding author: E-mail: [jiyajun@usst.edu.cn](mailto:jiyajun@usst.edu.cn) Fax: +86 21 65667144; Tel: +86 21 65667144

<sup>1</sup> These authors contributed equally to this work.

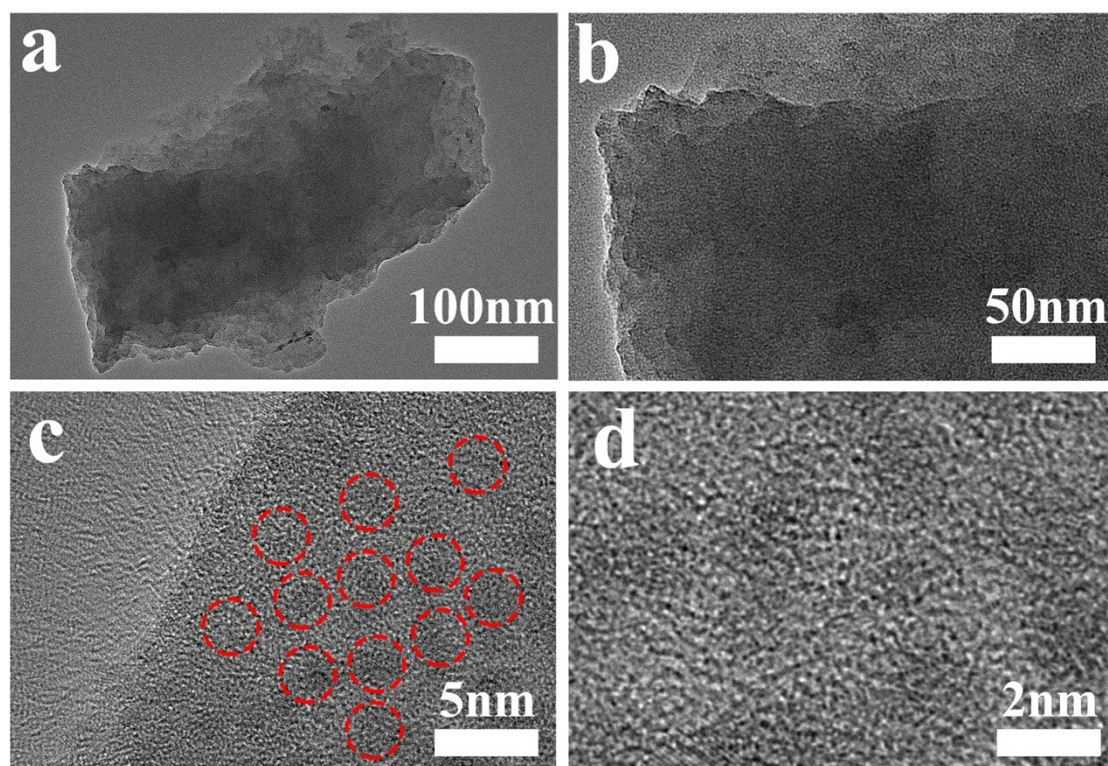

**Fig. S1.** TEM images of NiCo-MOF-2.

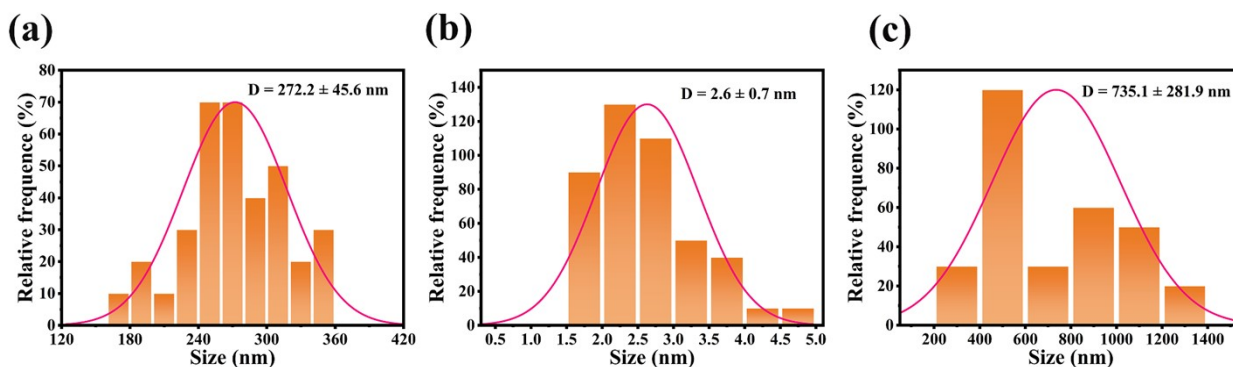

**Fig. S2.** The particle distribution plots of (a) NiCo-MOF-1, (b) NiCo-MOF-2 and (c) NiCo-MOF-3.

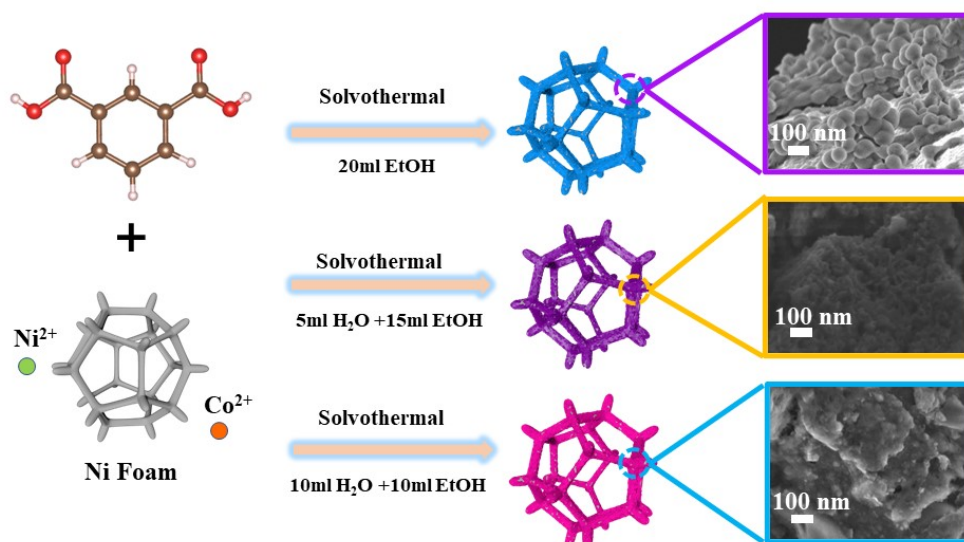

**Fig. S3.** Schematic illustration of the synthesis of NiCo-MOF-1, NiCo-MOF-2 and NiCo-MOF-3 and their representative morphologies.

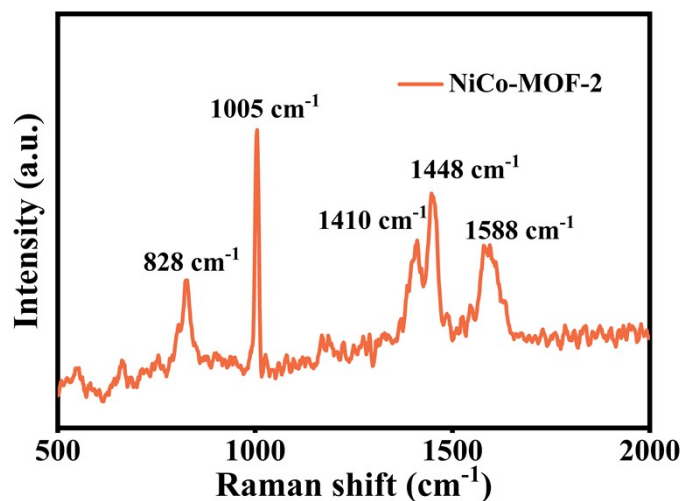

Fig. S4. The Raman spectroscopy of NiCo-MOF-2.

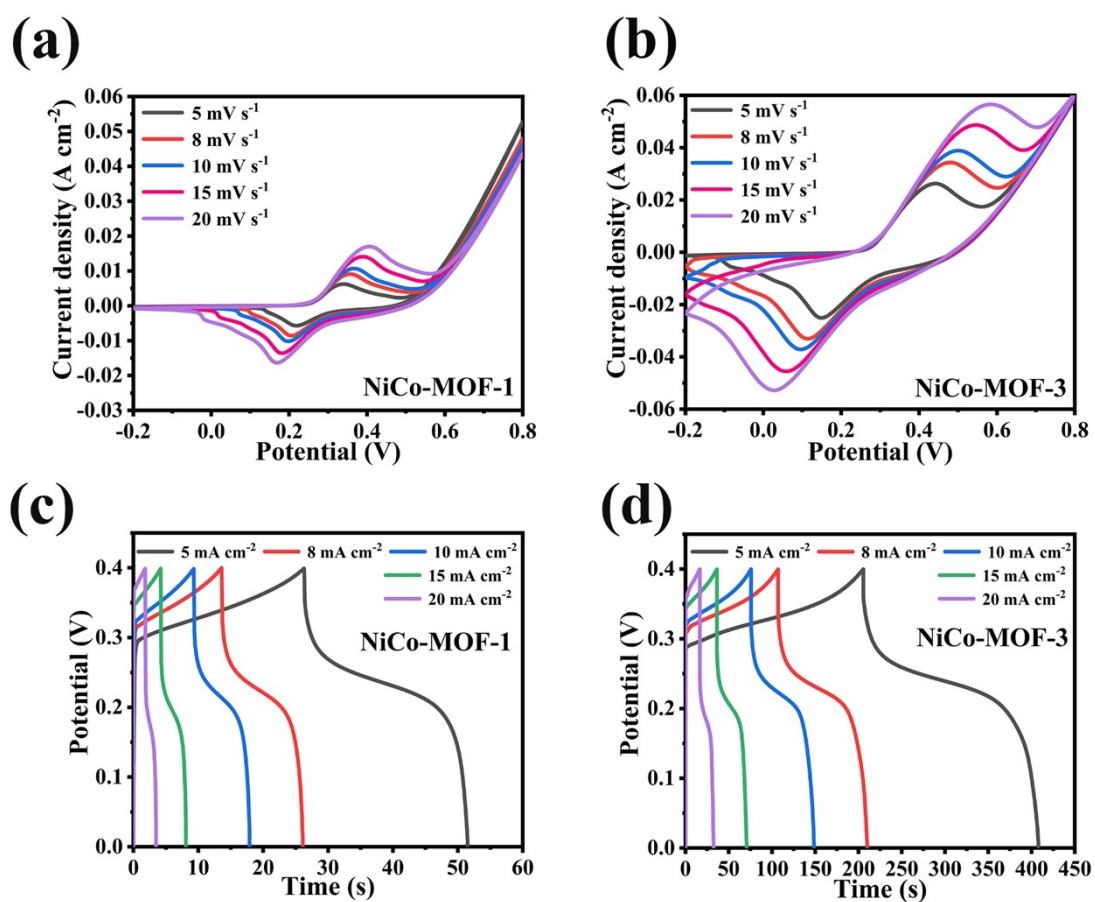

Fig. S5. (a-b) The CV curves and (c-d) GCD curves of NiCo-MOF-1 and NiCo-MOF-3.

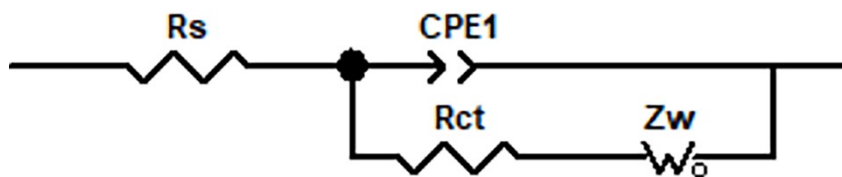

**Fig. S6.** The equivalent circuit model fitting Nyquist diagram.

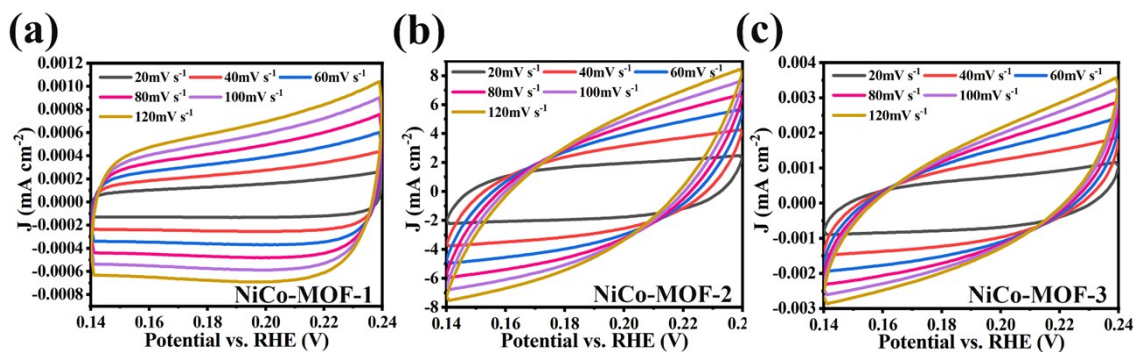

**Fig. S7.** CV curves of NiCo-MOF-1, NiCo-MOF-2 and NiCo-MOF-3 at different sweep speeds in the potential range of 0.14 V to 0.24 V.

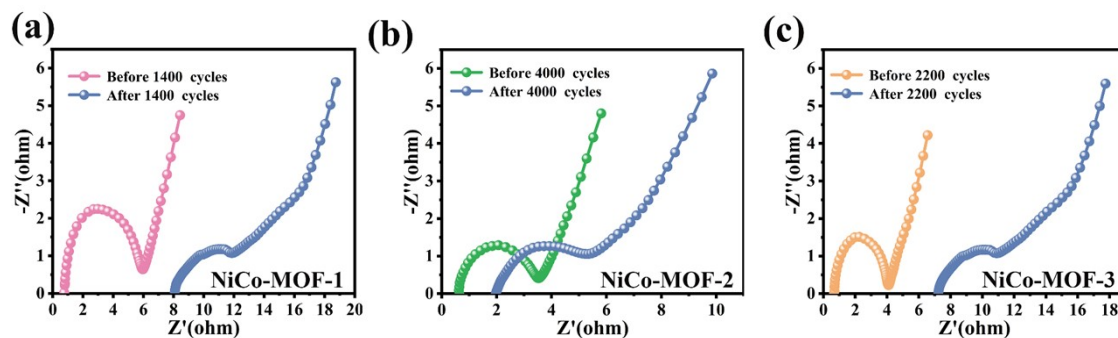

**Fig. S8.** EIS curves of NiCo-MOF-1, NiCo-MOF-2 and NiCo-MOF-3 before and after the stability test.

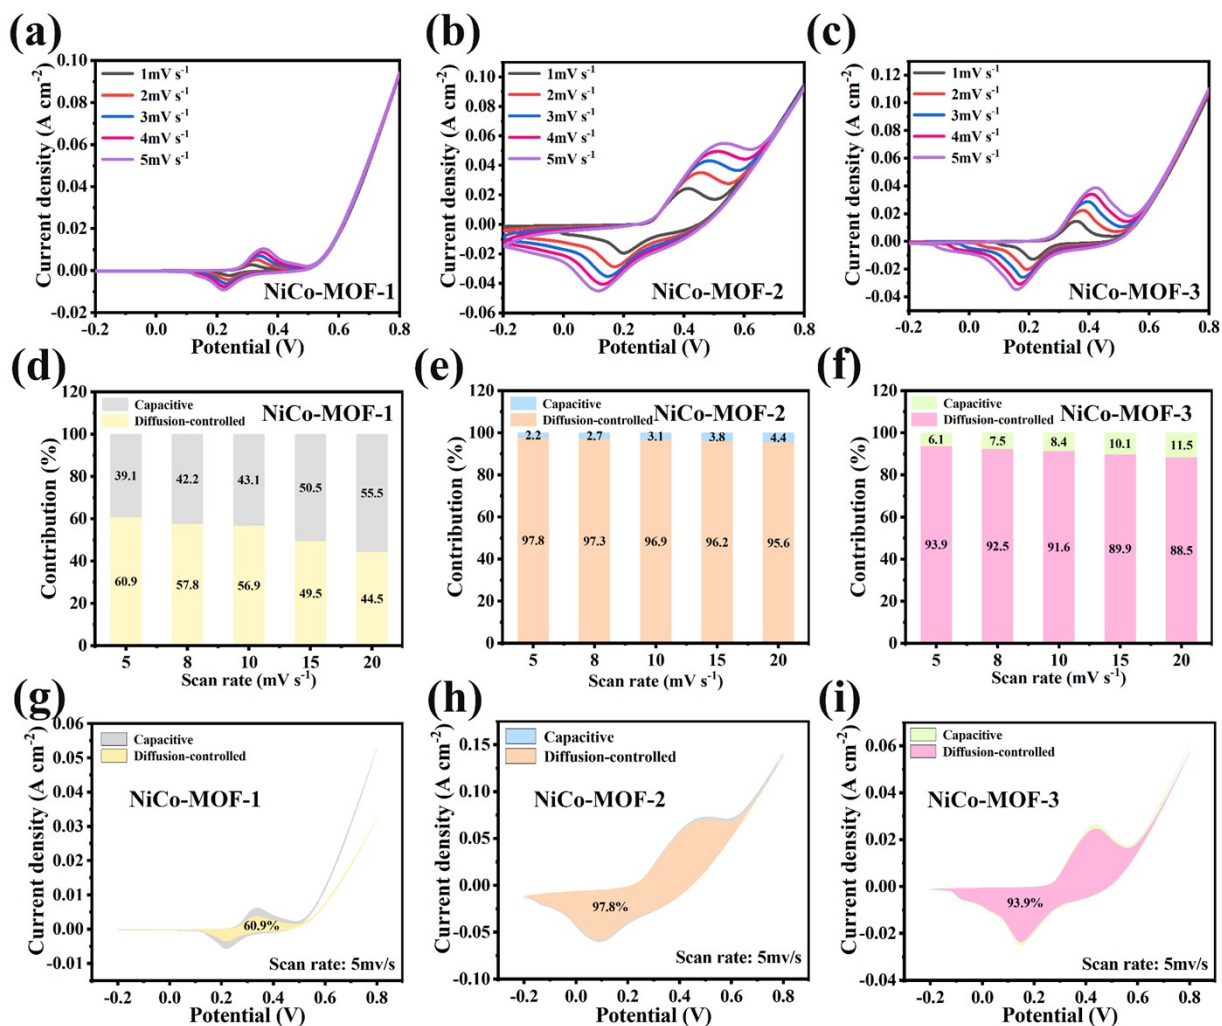

**Fig. S9.** (a-c) CV curves with the scan rate range from 1 mV s<sup>-1</sup> to 5 mV s<sup>-1</sup> in the potential range of -0.2-0.8 V; (d-f) Contribution ratio of capacitive and diffusion-controlled charge storage processes of NiCo-MOF-1, NiCo-MOF-2 and NiCo-MOF-3 and (g-i) the capacitive contribution and diffusive contribution of the NiCo-MOF-1, NiCo-MOF-2 and NiCo-MOF-3 at the scan rate of 5 mV s<sup>-1</sup>.

**Table S1.** Comparison of the internal resistance ( $R_s$ ) value and charge-transfer resistance ( $R_{ct}$ ) value of NiCo-MOF-1, NiCo-MOF-2 and NiCo-MOF-3.

| Sample     | $R_s$ ( $\Omega$ ) | $R_{ct}$ ( $\Omega$ ) |
|------------|--------------------|-----------------------|
| NiCo-MOF-1 | 0.8                | 4.9                   |
| NiCo-MOF-2 | 0.6                | 2.9                   |
| NiCo-MOF-3 | 0.7                | 3.2                   |

**Table S2.** Comparison of electrochemical performance of NiCo-MOF-2 with other works.

| Electrode materials      | Electrolyte | Areal specific capacitance                       | Specific capacitance                               | Rate capability | Capability retention | Ratio of diffusion-control | Refs.            |
|--------------------------|-------------|--------------------------------------------------|----------------------------------------------------|-----------------|----------------------|----------------------------|------------------|
| NiCo-MOFs/rGO            | 2 M KOH     | 4.31 F cm <sup>-2</sup> at 1 mA cm <sup>-2</sup> | —                                                  | 36.2%           | —                    | 36.66%                     | 1                |
| Co-MOF/NF                | 1 M LiOH    | 1.54 F cm <sup>-2</sup> at 1 mA cm <sup>-2</sup> | —                                                  | —               | 71% (1000 cycles)    | —                          | 2                |
| Ni/Co-MOF                | 2 M KOH     | —                                                | 758 F g <sup>-1</sup> at 1 A g <sup>-1</sup>       | —               | 75% (5000 cycles)    | —                          | 3                |
| Ni-MOF/NC                | 3 M KOH     | —                                                | 828 F g <sup>-1</sup> at 1 A g <sup>-1</sup>       | 44.68%          | —                    | 95.6%                      | 4                |
| Ni@Cu-MOF                | 6 M KOH     | —                                                | 526 F g <sup>-1</sup> at 1 A g <sup>-1</sup>       | 52.2%           | 80% (1200 cycles)    | —                          | 5                |
| NiCo MOF                 | 3 M KOH     | —                                                | 927.1 F g <sup>-1</sup> at 1 A g <sup>-1</sup>     | 69.7%           | —                    | —                          | 6                |
| CoNi <sub>0.5</sub> -MOF | 2 M KOH     | —                                                | 663.6 F g <sup>-1</sup> at 1 A g <sup>-1</sup>     | —               | —                    | 70%                        | 7                |
| NiCo-MOF                 | 2 M KOH     | —                                                | 916.1 F g <sup>-1</sup> at 1 A g <sup>-1</sup>     | 76.6%           | —                    | —                          | 8                |
| NiCo-MOF-2               | 1 M KOH     | 9.7 F cm <sup>-2</sup> at 5 mA cm <sup>-2</sup>  | 941.75 F g <sup>-1</sup> at 0.49 A g <sup>-1</sup> | 71.1%           | 82.83% (4000cycles)  | 97.8                       | <b>This work</b> |

**Table S3.** Comparison of the  $R_s$  and  $R_{ct}$  value of NiCo-MOF-1//AC, NiCo-MOF-2//AC and NiCo-MOF-3//AC.

| Sample         | $R_s$ ( $\Omega$ ) | $R_{ct}$ ( $\Omega$ ) |
|----------------|--------------------|-----------------------|
| NiCo-MOF-1//AC | 3.0                | 3.8                   |
| NiCo-MOF-2//AC | 1.3                | 2.1                   |
| NiCo-MOF-3//AC | 3.2                | 1.2                   |

---

## Reference

1. C. Shi, H. Cao, S. Li, L. Guo, Y. Wang and J. Yang, *Journal of Energy Storage*, 2022, **54**, 105270.
2. Y. Yu, Y. Han, J. Cui and C. Wang, *New J. Chem.*, 2022, **46**, 12565-12571.
3. S. Gao, Y. Sui, F. Wei, J. Qi, Q. Meng, Y. Ren and Y. He, *J Colloid Interface Sci*, 2018, **531**, 83-90.
4. R. Liang, Y. Du, J. Lin, J. Chen and P. Xiao, *Energy & Fuels*, 2022, **36**, 7115-7120.
5. Y. Wang, S. Nie, Y. Liu, W. Yan, S. Lin, G. Cheng, H. Yang and J. Luo, *Polymers (Basel)*, 2019, **11**.
6. Y. Du, R. Liang, J. Wu, Y. Ye, S. Chen, J. Yuan, J. Chen and P. Xiao, *RSC Adv*, 2022, **12**, 5910-5918.
7. W. Zhang, X. Guo, Y. Wang, Y. Zheng, J. Zhao, H. Xie, Z. Zhang and Y. Zhao, *Energy & Fuels*, 2022, **36**, 1716-1725.
8. Y. Liu, Y. Wang, H. Wang, P. Zhao, H. Hou and L. Guo, *Appl. Surf. Sci.*, 2019, **492**, 455-463.
